# Supplementary material
Source: publisher site journal article supplement (https://www.spandidos-publications.com/8414/downloadSupplementary)
Supplement: Supplementary file 1 [file downloadSupplementary]

## Sheet: Table SI
Table SI. Sample information of the 5 datasets used in the present study.
Datasets	Sequencing method	Sample type	Databases
GSE131907	scRNA-seq	58 LUAD	GEO
GSE30219	RNA-seq	293 LUAD with OS and expression matrix	GEO
GSE26939	RNA-seq	115 LUAD with OS and expression matrix	GEO
GSE72094	RNA-seq	398 LUAD with OS and expression matrix	GEO
TCGA-LUAD	RNA-seq	513 LUAD with OS and expression matrix	TCGA
sc, single cell; seq, sequencing; LUAD, lung adenocarcinoma; OS overall survival; GEO, Gene Expression Omnibus; TCGA, The Cancer Genome Atlas.

## Sheet: Table SII
Table SII. Primer sequences of the prognostic genes.
Gene	Forward (5'-3')	Reverse (5'-3')	Product length (bp)
β-actin	GGATTCCTATGTGGGCGACGA	GCGTACAGGGATAGCACAGC	282
CISH	GCGTTCAGGGACCTCGTC	CGTGCCTTCTGGCATCTTCT	299
CENPM	AGGCAGGCCACGGAGATAC	ATGGTGGCCCTAAAGCCTTC	104
GLCCI1	ACTCGCAGCATTGACACTCA	GCTACCATCCTGGGATTCCG	111
IKZF4	CGCAGACATGCATACACCAC	GAGTCCCCGCTACATTATCCT	107
MAGEH1	GCCTCTAGCAGGAGACATGC	TGAGGCCTGGATTTTGCGAT	100
PTTG1	GTGACTGTTCCGCTGTTTAGC	GGGTGCCTGGTTCTCCATTT	186
ZNF101	GGTCAGCCGAAAGGACGAA	CATTGGATTCCGAGGCCAGG	171
ZC3H12D	AGAAACCTTCTCTTGCCGGG	CGTGCTGCTCTCTGATAGGG	137

## Sheet: Table SIII
Table SIII. Quality control of GSE131907.
SampleID	nCells	nCount.Min	nCount.Median	nCount.Max	nFeature.Min	nFeature.Median	nFeature.Max	percentMT.min	percentMT.Median	percentMT.Max
BRONCHO_11	3057	1017	3781	101324	224	1067	8155	0	3.41915	19.9635
BRONCHO_58	2713	1002	2675	147113	203	1002	8733	0	3.04688	19.7993
EBUS_06	2201	1004	3300	110948	274	1145	9184	0	2.40312	19.2231
EBUS_10	4939	1000	2800	142169	219	916	8629	0	3.4045	19.7727
EBUS_12	2979	1022	6844	143668	215	2083	9417	0	3.51478	19.893
EBUS_13	3403	1002	3704	117314	231	1143	9715	0	3.41734	19.9438
EBUS_15	1062	1008	4135	144594	214	1264	9750	0.0937207	3.51983	19.9272
EBUS_19	2019	1005	4199	98092	201	1319	8883	0	3.09833	19.8547
EBUS_28	4958	1003	7982.5	90347	240	2354.5	7899	0	5.85321	19.7602
EBUS_49	1701	1001	3743	88402	205	1232	7708	0	3.00961	19.5914
EBUS_51	3131	1000	3288	76754	215	1186	7659	0	3.26685	19.9751
EFFUSION_06	4700	1001	3161.5	121370	308	1024	9712	0	3.52268	19.306
EFFUSION_11	2831	1002	2983	48908	235	998	6133	0	3.56513	19.8618
EFFUSION_12	4044	1005	4240	26278	342	1140	4088	0	3.5746	19.6825
EFFUSION_13	4266	1034	4392	22777	354	1163.5	3704	0	3.58505	19.0834
EFFUSION_64	3647	1000	3122	11871	328	1024	2748	0.0462107	2.82867	13.1431
LN_01	3474	1000	3036	63887	328	901	6163	0	2.25083	16.5947
LN_02	3060	1005	3349	50350	272	980	5435	0	2.95219	18.3045
LN_03	2881	1003	2941	49819	210	950	4188	0	2.47315	19.3117
LN_04	2968	1004	3176.5	36906	296	952	4928	0	2.84704	18.4557
LN_05	2955	1001	2403	9985	293	773	2316	0	1.19464	12.662
LN_06	2813	1004	3218	18921	306	989	3268	0	2.92198	19.2168
LN_07	5465	1000	2178	41534	201	745	2807	0	2.32409	11.9266
LN_08	4203	1000	3085	31141	255	856	4487	0	2.77008	18.4362
LN_11	3630	1002	3368.5	131764	284	983	7831	0	2.32068	17.5249
LN_12	4438	1000	3139	74961	201	926	6158	0	2.70009	19.8249
LUNG_N01	3060	1006	3748.5	64844	214	1326	7969	0.0545852	5.1747	19.9559
LUNG_N06	2725	1015	4308	75209	329	1330	6302	0.0968992	4.56757	19.9848
LUNG_N08	3235	1006	3771	91885	201	1263	7613	0.0458716	4.70876	19.5048
LUNG_N09	2419	1000	8923	60224	217	2162	5612	0	4.66531	19.9739
LUNG_N18	4424	1002	4159	58660	280	1340.5	7884	0	4.53382	19.808
LUNG_N19	3710	1000	3669.5	50716	231	1283	5755	0	3.70938	19.4301
LUNG_N20	5544	1003	5378	49140	324	1584.5	4931	0	5.25985	19.9572
LUNG_N28	3271	1001	2614	44351	203	1043	5831	0	4.59275	19.6524
LUNG_N30	3742	1001	2360	47404	239	929.5	6594	0	3.77754	19.7729
LUNG_N31	4052	1003	3765	46551	202	1323	6954	0	3.88797	19.9143
LUNG_N34	5005	1001	2396	48832	302	960	5498	0	4.8583	19.8994
LUNG_T06	3284	1015	3791	46983	212	1180.5	6754	0	3.72427	19.9161
LUNG_T08	3614	1004	3465	56803	205	1078.5	5155	0	3.56376	19.8735
LUNG_T09	3682	1000	3795	100709	222	1194	8082	0	3.70818	19.9864
LUNG_T18	3542	1002	3926	87064	257	1331.5	8746	0.0611621	3.70822	19.9658
LUNG_T19	4178	1002	3965	77972	249	1178	6609	0	3.44683	19.8929
LUNG_T20	3858	1005	3022	110300	235	1092	7895	0	3.91378	19.9588
LUNG_T25	4196	1001	2973	70477	201	913	6702	0	3.3827	19.9648
LUNG_T28	4499	1000	3081	96623	201	1076	8036	0	4.27533	19.8173
LUNG_T30	3911	1000	2673	33825	203	1007	5648	0	0.503303	19.8668
LUNG_T31	5362	1002	2166	99322	201	854	8905	0	2.86657	19.925
LUNG_T34	3136	1001	9083	68303	349	2292.5	7158	0	6.59232	19.9358
NS_02	2214	1002	4090.5	99669	334	1250.5	8128	0.0616523	3.41957	19.3956
NS_03	2868	1000	12697.5	93778	286	3109.5	8075	0	7.71189	19.9779
NS_04	1824	1004	15991	148044	268	3653.5	9227	0.0818331	5.48563	19.889
NS_06	1027	1002	4494	126872	204	1527	8550	0	2.6827	19.7419
NS_07	5483	1000	7541	43742	257	2392	6192	0	7.12228	19.9239
NS_12	3049	1000	8537	112204	230	2604	8872	0	4.86963	19.9815
NS_13	4635	1000	1948	61169	205	787	7083	0	1.6129	19.9753
NS_16	1260	1002	2798	79292	206	1034.5	6803	0	2.54855	19.8856
NS_17	2305	1000	3130	118496	251	1183	8674	0.0477327	3.78922	19.9901
NS_19	3156	1002	4270.5	99300	319	1389	8966	0.290416	4.00309	19.9825

## Sheet: Table SIV
Table IV. Proportion of regulatory T cells in different tissue types in GSE131907.
Sample	Source name	tissue origin abbrevation	Count	Percentage
BRONCHO_58	Tumour lung	tL/B	102	3.75968
BRONCHO_11	Metastatic lymph node	mLN	39	1.27576
EBUS_06	Metastatic lymph node	mLN	11	0.499773
EBUS_10	Metastatic lymph node	mLN	120	2.43063
EBUS_12	Metastatic lymph node	mLN	57	1.91339
EBUS_13	Metastatic lymph node	mLN	42	1.23421
EBUS_15	Metastatic lymph node	mLN	23	2.16573
EBUS_19	Metastatic lymph node	mLN	52	2.57553
EBUS_28	Metastatic lymph node	mLN	27	0.544574
EBUS_49	Metastatic lymph node	mLN	13	0.764256
EBUS_51	Metastatic lymph node	mLN	47	1.50112
EFFUSION_06	Pleural effusion	PE	61	1.29787
EFFUSION_11	Pleural effusion	PE	28	0.98905
EFFUSION_12	Pleural effusion	PE	84	2.07715
EFFUSION_13	Pleural effusion	PE	100	2.34412
EFFUSION_64	Pleural effusion	PE	77	2.11132
LN_01	Normal lymph node	nLN	93	2.67703
LN_02	Normal lymph node	nLN	55	1.79739
LN_03	Normal lymph node	nLN	87	3.01978
LN_04	Normal lymph node	nLN	61	2.05526
LN_05	Normal lymph node	nLN	52	1.75973
LN_06	Normal lymph node	nLN	72	2.55954
LN_07	Normal lymph node	nLN	94	1.72067
LN_08	Normal lymph node	nLN	84	1.99857
LN_11	Normal lymph node	nLN	148	4.07713
LN_12	Normal lymph node	nLN	119	2.68139
LUNG_N01	Normal lung	nLung	21	0.686275
LUNG_N06	Normal lung	nLung	12	0.440367
LUNG_N08	Normal lung	nLung	23	0.710974
LUNG_N09	Normal lung	nLung	18	0.744109
LUNG_N18	Normal lung	nLung	49	1.10759
LUNG_N19	Normal lung	nLung	24	0.6469
LUNG_N20	Normal lung	nLung	18	0.324675
LUNG_N28	Normal lung	nLung	31	0.947722
LUNG_N30	Normal lung	nLung	28	0.748263
LUNG_N31	Normal lung	nLung	22	0.543076
LUNG_N34	Normal lung	nLung	20	0.3996
LUNG_T06	Tumour lung	tLung	90	2.74056
LUNG_T08	Tumour lung	tLung	113	3.12673
LUNG_T09	Tumour lung	tLung	63	1.71103
LUNG_T18	Tumour lung	tLung	99	2.79503
LUNG_T19	Tumour lung	tLung	91	2.17808
LUNG_T20	Tumour lung	tLung	95	2.46242
LUNG_T25	Tumour lung	tLung	79	1.88319
LUNG_T28	Tumour lung	tLung	79	1.75595
LUNG_T30	Tumour lung	tLung	62	1.58527
LUNG_T31	Tumour lung	tLung	99	1.84633
LUNG_T34	Tumour lung	tLung	26	0.829082
NS_02	Metastatic brain	mBrain	60	2.71003
NS_03	Metastatic brain	mBrain	14	0.488145
NS_04	Metastatic brain	mBrain	21	1.15132
NS_06	Metastatic brain	mBrain	15	1.46056
NS_07	Metastatic brain	mBrain	14	0.255335
NS_12	Metastatic brain	mBrain	0	0
NS_13	Metastatic brain	mBrain	70	1.51025
NS_16	Metastatic brain	mBrain	23	1.8254
NS_17	Metastatic brain	mBrain	37	1.60521
NS_19	Metastatic brain	mBrain	30	0.95057

## Sheet: Table SV
Table SV. Markers of Tregs identified in GSE131907.
cell	gene	pct.1	pct.2	avg_log2FC	p_val	p_val_adj
Treg	FOXP3	0.49	0.006	6.76131	0	0
Treg	AC017002.1	0.262	0.004	6.4958	0	0
Treg	CCR8	0.02	0	6.4068	0	0
Treg	AC145110.1	0.069	0.002	6.06372	0	0
Treg	PMCH	0.086	0.003	6.02669	0	0
Treg	GNG8	0.064	0.002	5.67825	0	0
Treg	AHSP	0.037	0.001	5.60113	0	0
Treg	IL2RA	0.551	0.031	5.55152	0	0
Treg	LINC01229	0.012	0	5.50724	1.97107e-162	5.84106e-158
Treg	TNFRSF4	0.636	0.053	5.49119	0	0
Treg	AC133644.2	0.59	0.036	5.14652	0	0
Treg	TSHR	0.013	0.001	4.99591	3.52031e-105	1.04321e-100
Treg	LAYN	0.229	0.014	4.91825	0	0
Treg	CHRNA6	0.019	0.001	4.82554	4.9041e-179	1.45328e-174
Treg	FANK1	0.205	0.02	4.81482	0	0
Treg	CTLA4	0.467	0.024	4.80073	0	0
Treg	AC011997.1	0.014	0.001	4.77713	1.53993e-97	4.56343e-93
Treg	GTSF1L	0.013	0.001	4.67208	5.27704e-150	1.5638e-145
Treg	TNFRSF18	0.633	0.075	4.64906	0	0
Treg	CARD17	0.015	0.001	4.61494	2.3216e-136	6.87983e-132
Treg	IL1R2	0.174	0.014	4.53921	0	0
Treg	TNFRSF9	0.311	0.02	4.53905	0	0
Treg	SLC8A1-AS1	0.01	0.001	4.52331	1.70675e-33	5.05778e-29
Treg	F5	0.102	0.009	4.40745	0	0
Treg	DNAH8	0.013	0.001	4.13947	2.14027e-82	6.34247e-78
Treg	TNFRSF8	0.048	0.004	4.11123	1.30464e-272	3.86618e-268
Treg	BTNL8	0.011	0.001	4.09446	4.82936e-48	1.43113e-43
Treg	C15orf53	0.041	0.002	4.0878	0	0
Treg	RP11-356I2.1	0.033	0.002	4.08423	1.97497e-293	5.85263e-289
Treg	RP1-90J4.1	0.01	0.001	4.07301	1.58039e-49	4.68331e-45
Treg	AC002331.1	0.175	0.01	4.05415	0	0
Treg	GATA3-AS1	0.011	0.001	4.01842	6.96081e-65	2.06277e-60
Treg	LINC01281	0.076	0.005	3.98346	0	0
Treg	TIGIT	0.762	0.085	3.97923	0	0
Treg	XXYLT1-AS2	0.029	0.002	3.97021	9.36149e-191	2.77418e-186
Treg	CD177	0.098	0.007	3.95855	0	0
Treg	UNQ6494	0.057	0.008	3.91218	2.45597e-196	7.27801e-192
Treg	RP11-563D10.1	0.011	0.001	3.87877	4.72461e-61	1.40009e-56
Treg	BATF	0.671	0.149	3.79728	0	0
Treg	TMPRSS6	0.021	0.005	3.78146	2.29637e-36	6.80508e-32
Treg	TBC1D4	0.435	0.066	3.75169	0	0
Treg	RTKN2	0.261	0.022	3.7409	0	0
Treg	CUL9	0.17	0.031	3.73786	0	0
Treg	CPA5	0.025	0.002	3.73703	8.42124e-174	2.49555e-169
Treg	RP1-167O22.1	0.041	0.003	3.73121	5.99608e-285	1.77688e-280
Treg	ZBED2	0.077	0.009	3.73089	0	0
Treg	LAIR2	0.43	0.039	3.67136	0	0
Treg	FAM78B	0.011	0.002	3.64838	9.90676e-28	2.93577e-23
Treg	ETV7	0.19	0.037	3.64287	0	0
Treg	ADAM12	0.083	0.01	3.62739	0	0
Treg	MAGEH1	0.35	0.08	3.56616	0	0
Treg	ZBTB32	0.11	0.011	3.56066	0	0
Treg	ICA1	0.352	0.094	3.55428	0	0
Treg	LRRC32	0.058	0.006	3.521	8.27726e-263	2.45288e-258
Treg	IL12RB2	0.034	0.003	3.5016	5.63776e-191	1.67069e-186
Treg	ZBTB20-AS1	0.01	0.001	3.45467	4.90383e-63	1.4532e-58
Treg	BFSP2-AS1	0.01	0.001	3.41787	6.35375e-49	1.88287e-44
Treg	AC074289.1	0.073	0.013	3.38231	5.7107e-187	1.69231e-182
Treg	RP11-1399P15.1	0.25	0.034	3.37476	0	0
Treg	ICOS	0.525	0.075	3.30515	0	0
Treg	IKZF4	0.106	0.026	3.30498	1.8887e-174	5.59697e-170
Treg	IKZF2	0.139	0.03	3.2717	2.48355e-277	7.35974e-273
Treg	LTA	0.145	0.02	3.25592	0	0
Treg	ASB2	0.151	0.019	3.24859	0	0
Treg	ACTG2	0.025	0.002	3.24093	1.13206e-132	3.35475e-128
Treg	RP11-214O1.2	0.01	0.001	3.20063	1.55041e-37	4.59448e-33
Treg	BFSP2	0.03	0.004	3.19479	1.73751e-99	5.14893e-95
Treg	HACD1	0.147	0.041	3.13251	4.3867e-207	1.29996e-202
Treg	CLNK	0.089	0.012	3.10621	0	0
Treg	MEOX1	0.031	0.005	3.09415	2.99726e-99	8.88207e-95
Treg	RP11-181E10.3	0.015	0.002	3.06573	7.32094e-49	2.16949e-44
Treg	SIRPG	0.331	0.045	3.05882	0	0
Treg	TOX2	0.138	0.021	3.03373	0	0
Treg	RP3-492J12.2	0.043	0.005	3.00947	4.76529e-176	1.41215e-171
Treg	MIR3142HG	0.027	0.004	2.9911	1.94914e-72	5.77608e-68
Treg	STAM	0.229	0.062	2.98599	0	0
Treg	CXCR6	0.313	0.038	2.97803	0	0
Treg	PTGIR	0.072	0.016	2.90951	4.12661e-137	1.22288e-132
Treg	TBC1D8	0.041	0.015	2.87939	1.4327e-32	4.24567e-28
Treg	CD70	0.134	0.025	2.87892	0	0
Treg	CD27	0.752	0.183	2.87587	0	0
Treg	EBI3	0.057	0.011	2.87545	5.70576e-133	1.69084e-128
Treg	CRADD	0.183	0.054	2.86912	3.85094e-239	1.14119e-234
Treg	RP11-275I4.2	0.013	0.002	2.86881	2.16235e-39	6.4079e-35
Treg	ZC3H12D	0.145	0.024	2.86505	0	0
Treg	GPR19	0.018	0.003	2.85682	4.07202e-46	1.2067e-41
Treg	SLAMF1	0.201	0.032	2.8199	0	0
Treg	HS3ST3B1	0.132	0.024	2.80619	0	0
Treg	DUSP4	0.559	0.143	2.77099	0	0
Treg	TRAV36DV7	0.019	0.003	2.74691	1.12765e-54	3.34167e-50
Treg	MIR4435-2HG	0.454	0.145	2.74316	0	0
Treg	ANKS1B	0.054	0.008	2.72686	2.10357e-162	6.23373e-158
Treg	RP11-214O1.3	0.061	0.011	2.72641	8.92247e-155	2.64408e-150
Treg	PAGE5	0.014	0.002	2.72538	7.91091e-45	2.34432e-40
Treg	SSTR3	0.014	0.002	2.72136	1.44885e-35	4.29353e-31
Treg	FBLN7	0.139	0.03	2.71534	1.16248e-273	3.44489e-269
Treg	WNT10A	0.105	0.029	2.69127	4.493e-142	1.33146e-137
Treg	HAPLN3	0.178	0.043	2.6575	0	0
Treg	RP11-803D5.4	0.056	0.015	2.64442	5.79472e-76	1.71721e-71
Treg	IL32	0.991	0.527	2.64063	0	0
Treg	PIM2	0.528	0.147	2.61231	0	0
Treg	DUSP16	0.193	0.059	2.59903	8.62085e-235	2.5547e-230
Treg	ADAT2	0.073	0.02	2.59682	6.11403e-100	1.81183e-95
Treg	CCR4	0.029	0.005	2.59486	9.61286e-85	2.84867e-80
Treg	MCF2L2	0.031	0.008	2.54593	1.77494e-51	5.25985e-47
Treg	SPOCK2	0.712	0.182	2.53631	0	0
Treg	TNFRSF1B	0.577	0.18	2.5126	0	0
Treg	SERPINE2	0.087	0.027	2.4887	2.31067e-96	6.84743e-92
Treg	PMAIP1	0.567	0.229	2.47539	0	0
Treg	GBP5	0.345	0.079	2.47248	0	0
Treg	IZUMO4	0.07	0.024	2.4713	3.07908e-65	9.12454e-61
Treg	CEP55	0.028	0.012	2.46994	5.26279e-15	1.55958e-10
Treg	PPP1R3F	0.03	0.01	2.46579	2.69637e-28	7.99041e-24
Treg	TRAV6	0.01	0.002	2.46506	7.36345e-20	2.18208e-15
Treg	ENTPD1	0.251	0.081	2.45605	1.58527e-289	4.69778e-285
Treg	PIK3IP1-AS1	0.013	0.003	2.45405	5.26007e-23	1.55877e-18
Treg	REEP2	0.012	0.005	2.42413	2.83473e-10	8.40044e-06
Treg	GADD45A	0.339	0.14	2.40818	5.71055e-286	1.69226e-281
Treg	COL9A2	0.087	0.033	2.40766	9.96792e-69	2.95389e-64
Treg	CD28	0.249	0.049	2.39409	0	0
Treg	TRAF1	0.219	0.054	2.38304	0	0
Treg	GBP2	0.586	0.209	2.38185	0	0
Treg	DGUOK-AS1	0.025	0.014	2.34985	8.62706e-08	0.00255654
Treg	RP11-105N14.1	0.012	0.005	2.34435	2.87486e-10	8.51936e-06
Treg	C17orf96	0.03	0.013	2.3441	6.09903e-16	1.80739e-11
Treg	RAB33A	0.149	0.032	2.34208	5.92958e-293	1.75717e-288
Treg	PARD6G	0.035	0.012	2.33637	6.56306e-32	1.9449e-27
Treg	CCDC141	0.053	0.012	2.32934	3.36369e-94	9.96795e-90
Treg	CARD16	0.684	0.302	2.30393	0	0
Treg	PAK3	0.012	0.004	2.2937	1.51751e-11	4.49698e-07
Treg	TRAC	0.979	0.399	2.29258	0	0
Treg	IL18R1	0.075	0.016	2.29065	4.0637e-152	1.20424e-147
Treg	TRAV4	0.039	0.009	2.2841	7.86174e-71	2.32975e-66
Treg	PNMA5	0.011	0.003	2.28224	2.03597e-18	6.03339e-14
Treg	JAKMIP1	0.129	0.023	2.26993	0	0
Treg	ARID5B	0.652	0.264	2.26795	0	0
Treg	PHTF2	0.209	0.083	2.25526	1.4253e-163	4.22374e-159
Treg	LINC00891	0.041	0.015	2.2394	2.10768e-31	6.2459e-27
Treg	LMCD1	0.095	0.028	2.23569	1.12714e-115	3.34017e-111
Treg	FAS	0.227	0.08	2.22561	2.84744e-217	8.4381e-213
Treg	CORO1B	0.601	0.327	2.21638	0	0
Treg	FAM19A2	0.027	0.01	2.21387	1.07028e-19	3.17168e-15
Treg	TNFRSF25	0.271	0.068	2.2029	0	0
Treg	CHN1	0.082	0.022	2.1988	4.0975e-111	1.21425e-106
Treg	ZC2HC1A	0.13	0.071	2.18814	2.70902e-46	8.02792e-42
Treg	RP11-568N6.1	0.02	0.008	2.18681	6.11121e-15	1.811e-10
Treg	TTN	0.071	0.018	2.1789	5.44424e-102	1.61334e-97
Treg	LINC00426	0.077	0.018	2.16935	1.16658e-133	3.45703e-129
Treg	ADTRP	0.101	0.048	2.16682	2.9809e-49	8.83359e-45
Treg	LINC00152	0.619	0.27	2.16248	0	0
Treg	PTTG1	0.368	0.113	2.1558	0	0
Treg	SARDH	0.054	0.013	2.1532	6.24319e-91	1.85011e-86
Treg	PRDM1	0.331	0.101	2.14717	0	0
Treg	POU3F1	0.023	0.006	2.13358	3.80965e-30	1.12895e-25
Treg	EPHX2	0.151	0.055	2.12792	1.82575e-131	5.41041e-127
Treg	IL21R	0.143	0.038	2.12649	7.69484e-200	2.28029e-195
Treg	PBXIP1	0.553	0.203	2.12247	0	0
Treg	LINC01260	0.013	0.003	2.12149	6.40945e-21	1.89938e-16
Treg	FAM184A	0.042	0.02	2.11648	9.55231e-19	2.83073e-14
Treg	INPP5F	0.075	0.042	2.09754	8.91863e-23	2.64295e-18
Treg	METTL8	0.199	0.079	2.09688	5.19224e-150	1.53867e-145
Treg	TSPAN5	0.196	0.069	2.08862	5.59259e-183	1.65731e-178
Treg	APOLD1	0.066	0.022	2.08692	6.34825e-62	1.88124e-57
Treg	LRRC2	0.016	0.005	2.08689	3.43061e-18	1.01663e-13
Treg	THADA	0.108	0.05	2.08486	3.77398e-53	1.11838e-48
Treg	SH2D2A	0.348	0.084	2.08436	0	0
Treg	LTB	0.91	0.433	2.08435	0	0
Treg	RGS1	0.827	0.365	2.08195	0	0
Treg	B3GALT2	0.011	0.003	2.06602	2.47918e-15	7.3468e-11
Treg	TRBV28	0.013	0.003	2.06593	5.77264e-21	1.71066e-16
Treg	CCR6	0.158	0.046	2.05625	9.06611e-197	2.68665e-192
Treg	CISH	0.119	0.071	2.05451	1.16891e-30	3.46394e-26
Treg	TRAV13-2	0.025	0.005	2.04848	3.35459e-46	9.94098e-42
Treg	NETO2	0.044	0.03	2.04538	7.57344e-07	0.0224431
Treg	TRAV8-2	0.018	0.004	2.04219	1.63485e-31	4.84472e-27
Treg	GCNT1	0.081	0.048	2.04026	8.78957e-22	2.6047e-17
Treg	VAV3	0.097	0.037	2.03655	5.21222e-75	1.54459e-70
Treg	AF131217.1	0.013	0.003	2.03425	2.40326e-24	7.12181e-20
Treg	SMPD3	0.032	0.009	2.02542	9.58735e-37	2.84112e-32
Treg	GEM	0.119	0.059	2.02341	1.18861e-50	3.52234e-46
Treg	RP11-347I19.7	0.018	0.007	2.02064	1.4353e-11	4.25336e-07
Treg	HIST1H2BN	0.101	0.04	2.01519	5.49646e-70	1.62882e-65
Treg	CXCR3	0.313	0.082	2.01281	0	0
Treg	MIR155HG	0.119	0.054	2.01072	2.29161e-61	6.79095e-57
Treg	SLC16A1	0.098	0.039	2.0038	1.06923e-69	3.16857e-65
Treg	DFNB31	0.074	0.027	2.00373	1.29298e-60	3.8316e-56
Treg	MAST4	0.206	0.094	2.00032	1.01557e-120	3.00953e-116
Treg	PTP4A3	0.124	0.065	1.99866	2.98031e-48	8.83186e-44
Treg	GATA3	0.314	0.099	1.98785	0	0
Treg	TNIP3	0.082	0.026	1.98099	1.20528e-86	3.57172e-82
Treg	DNPH1	0.532	0.278	1.97782	0	0
Treg	CHST7	0.08	0.03	1.97541	5.5572e-62	1.64682e-57
Treg	IL2RB	0.379	0.09	1.96691	0	0
Treg	TMPRSS3	0.019	0.01	1.94933	5.0136e-07	0.0148573
Treg	OLFM2	0.073	0.028	1.94882	6.66714e-53	1.97574e-48
Treg	CD2	0.86	0.32	1.94069	0	0
Treg	LINC01358	0.014	0.005	1.94012	1.68323e-14	4.98807e-10
Treg	RP11-367G6.3	0.059	0.016	1.93773	2.44672e-78	7.25062e-74
Treg	AC147651.4	0.067	0.028	1.93557	6.32465e-42	1.87425e-37
Treg	PCED1B	0.19	0.08	1.935	2.99978e-126	8.88955e-122
Treg	PBX4	0.094	0.028	1.9029	2.99084e-109	8.86306e-105
Treg	TRBC1	0.577	0.268	1.89904	0	0
Treg	PKIA	0.045	0.022	1.89463	5.43577e-20	1.61084e-15
Treg	PLCL1	0.031	0.011	1.89335	3.01788e-25	8.94319e-21
Treg	CD7	0.751	0.295	1.89273	0	0
Treg	BTLA	0.083	0.023	1.8923	5.35204e-107	1.58602e-102
Treg	LINC00649	0.135	0.044	1.89221	3.50357e-134	1.03825e-129
Treg	ERI1	0.096	0.049	1.8901	7.60196e-39	2.25277e-34
Treg	RP11-973H7.4	0.013	0.003	1.88336	2.83517e-22	8.40176e-18
Treg	BCL2	0.244	0.082	1.8832	7.12829e-248	2.1124e-243
Treg	RP3-395M20.9	0.021	0.006	1.88288	1.38064e-27	4.09138e-23
Treg	NDFIP2	0.173	0.087	1.88258	4.29394e-78	1.27247e-73
Treg	CD3D	0.947	0.369	1.87666	0	0
Treg	GPR82	0.16	0.051	1.8653	3.81305e-169	1.12996e-164
Treg	SLC35F2	0.067	0.039	1.86424	1.89355e-17	5.61136e-13
Treg	PHLDA1	0.41	0.19	1.86249	1.79167e-281	5.30945e-277
Treg	LRRC61	0.086	0.051	1.86223	3.06996e-21	9.09753e-17
Treg	IL7	0.038	0.022	1.8611	1.0615e-10	3.14566e-06
Treg	NAB1	0.119	0.062	1.85975	3.48457e-44	1.03262e-39
Treg	USP51	0.029	0.016	1.84798	1.46665e-08	0.000434626
Treg	SNX9	0.27	0.141	1.84111	2.70866e-126	8.02684e-122
Treg	BHLHE40-AS1	0.018	0.005	1.84052	2.65934e-24	7.88069e-20
Treg	SIT1	0.391	0.123	1.8345	0	0
Treg	ZDBF2	0.031	0.012	1.83279	9.04171e-22	2.67942e-17
Treg	NHLRC4	0.018	0.006	1.81918	1.37735e-15	4.08164e-11
Treg	TRAF3	0.154	0.074	1.81838	2.51184e-74	7.44359e-70
Treg	TRBC2	0.806	0.359	1.8141	0	0
Treg	CCND2	0.326	0.12	1.81322	5.30758e-297	1.57285e-292
Treg	BCAS3	0.06	0.034	1.81185	2.26503e-17	6.7122e-13
Treg	PRKAR1B	0.079	0.045	1.80256	1.68645e-22	4.99762e-18
Treg	CEACAM1	0.055	0.036	1.79663	3.81257e-10	1.12982e-05
Treg	VDR	0.091	0.067	1.79476	1.87201e-10	5.54752e-06
Treg	SKAP1	0.47	0.157	1.79148	0	0
Treg	HOXB-AS1	0.083	0.037	1.79095	4.40218e-44	1.30454e-39
Treg	STAMBPL1	0.098	0.034	1.78638	1.70039e-87	5.03893e-83
Treg	ZNRF1	0.112	0.062	1.78255	5.68778e-36	1.68552e-31
Treg	UTS2	0.203	0.069	1.7779	5.48633e-193	1.62582e-188
Treg	IGFLR1	0.087	0.039	1.77747	3.63729e-44	1.07787e-39
Treg	P2RY10	0.253	0.08	1.76638	8.22052e-274	2.43607e-269
Treg	CD80	0.031	0.018	1.76636	3.65692e-08	0.00108369
Treg	GALM	0.301	0.143	1.76218	3.57268e-174	1.05873e-169
Treg	MAF	0.295	0.126	1.7593	2.84865e-206	8.4417e-202
Treg	OTUD5	0.174	0.113	1.74036	9.11927e-37	2.7024e-32
Treg	LACTB2-AS1	0.048	0.016	1.73752	1.08951e-45	3.22867e-41
Treg	RP11-553L6.2	0.057	0.016	1.73555	1.0886e-68	3.22597e-64
Treg	TCAF2	0.05	0.02	1.73123	6.21443e-35	1.84158e-30
Treg	IL12RB1	0.202	0.074	1.72677	1.66705e-168	4.94013e-164
Treg	LINC01089	0.098	0.042	1.72562	6.20739e-58	1.8395e-53
Treg	ZCCHC18	0.018	0.005	1.72417	1.83819e-24	5.4473e-20
Treg	PDCD1	0.11	0.027	1.72219	2.66708e-168	7.90361e-164
Treg	CTD-2020K17.1	0.106	0.041	1.72122	7.70368e-78	2.28291e-73
Treg	PHACTR2	0.246	0.133	1.71966	2.30501e-102	6.83067e-98
Treg	CPNE2	0.097	0.068	1.71778	1.24625e-13	3.69312e-09
Treg	LY6G5C	0.04	0.024	1.71621	3.42559e-10	1.01514e-05
Treg	MICAL2	0.085	0.055	1.70821	3.76946e-15	1.11704e-10
Treg	CD200	0.045	0.017	1.70737	3.33274e-35	9.87625e-31
Treg	2024-03-03	0.076	0.036	1.70668	4.65782e-35	1.3803e-30
Treg	CCL22	0.022	0.007	1.70509	8.60267e-23	2.54932e-18
Treg	PRDM8	0.025	0.012	1.70031	4.67289e-10	1.38477e-05
Treg	DLGAP1-AS1	0.141	0.064	1.69959	2.77518e-74	8.22398e-70
Treg	SLC27A2	0.034	0.022	1.69651	3.34327e-07	0.00990744
Treg	TOX	0.141	0.047	1.69076	1.72798e-133	5.1207e-129
Treg	IL2RG	0.766	0.358	1.67671	0	0
Treg	NINJ2	0.161	0.093	1.67534	4.91199e-49	1.45562e-44
Treg	TNFRSF13B	0.112	0.037	1.67114	1.89297e-106	5.60963e-102
Treg	FAM122C	0.043	0.021	1.67106	3.66864e-18	1.08717e-13
Treg	CD5	0.254	0.076	1.67084	1.93921e-296	5.74664e-292
Treg	LAX1	0.108	0.033	1.67066	2.52658e-121	7.48726e-117
Treg	CCNG2	0.143	0.097	1.66949	9.32486e-25	2.76333e-20
Treg	FCRL3	0.055	0.015	1.66766	9.4165e-72	2.79048e-67
Treg	PVT1	0.175	0.085	1.66737	6.43082e-82	1.90571e-77
Treg	RASGRP1	0.225	0.08	1.66639	3.86343e-196	1.14489e-191
Treg	ITM2A	0.508	0.193	1.66473	0	0
Treg	TTC39C	0.312	0.146	1.64812	7.55443e-180	2.23868e-175
Treg	LCK	0.74	0.275	1.64743	0	0
Treg	HNRNPLL	0.187	0.102	1.64034	1.1597e-67	3.43666e-63
Treg	CD4	0.309	0.154	1.63654	2.18175e-163	6.46539e-159
Treg	SUSD3	0.3	0.118	1.62948	1.65801e-232	4.91334e-228
Treg	ZNF101	0.18	0.071	1.62921	1.37378e-128	4.07106e-124
Treg	IPCEF1	0.11	0.041	1.62782	4.78666e-85	1.41848e-80
Treg	DUSP10	0.219	0.114	1.62411	8.74496e-91	2.59148e-86
Treg	BEND7	0.051	0.03	1.62059	1.21213e-12	3.59203e-08
Treg	C16orf87	0.169	0.09	1.61833	3.04526e-63	9.02433e-59
Treg	FOXO1	0.132	0.057	1.61664	9.64624e-78	2.85857e-73
Treg	ITPRIPL1	0.039	0.012	1.61336	2.99522e-42	8.87604e-38
Treg	LAG3	0.126	0.064	1.60697	6.32428e-47	1.87414e-42
Treg	ZNF80	0.015	0.004	1.60522	7.27612e-24	2.15621e-19
Treg	KLHDC7B	0.063	0.026	1.6036	3.5828e-39	1.06173e-34
Treg	REC8	0.067	0.035	1.5984	1.27138e-24	3.76762e-20
Treg	BIRC3	0.657	0.334	1.59678	0	0
Treg	PCYOX1L	0.037	0.023	1.59491	5.66153e-08	0.00167774
Treg	SH2D1A	0.3	0.095	1.59273	0	0
Treg	IRF4	0.075	0.029	1.5877	8.29786e-52	2.45899e-47
Treg	NCK2	0.167	0.088	1.58061	3.5948e-62	1.06528e-57
Treg	EPSTI1	0.355	0.186	1.57878	1.49178e-169	4.42074e-165
Treg	AKIP1	0.152	0.11	1.5668	2.15093e-21	6.37405e-17
Treg	IL10RA	0.389	0.184	1.5665	5.3418e-231	1.58299e-226
Treg	GLCCI1	0.153	0.077	1.56581	9.47399e-65	2.80752e-60
Treg	FAM110A	0.164	0.1	1.56169	2.3604e-41	6.9948e-37
Treg	LAT	0.563	0.211	1.56026	0	0
Treg	MIR181A1HG	0.062	0.036	1.55835	2.3616e-16	6.99837e-12
Treg	KCNN4	0.113	0.077	1.55785	1.03163e-18	3.05712e-14
Treg	GRPEL2	0.047	0.033	1.55733	9.60986e-07	0.0284779
Treg	RHOH	0.602	0.263	1.55493	0	0
Treg	RP11-493L12.4	0.026	0.01	1.55035	1.97923e-18	5.86526e-14
Treg	HOXB2	0.203	0.1	1.54839	7.40761e-94	2.19517e-89
Treg	CSTF2	0.044	0.029	1.5474	4.43975e-07	0.0131568
Treg	INPP1	0.093	0.067	1.54506	2.58628e-11	7.66419e-07
Treg	NEMP2	0.035	0.019	1.54456	3.47141e-12	1.02872e-07
Treg	NDC80	0.036	0.017	1.53714	3.58702e-16	1.06298e-11
Treg	CENPM	0.107	0.05	1.53673	3.22917e-50	9.56931e-46
Treg	RP11-25K19.1	0.08	0.032	1.53511	1.83857e-51	5.44842e-47
Treg	GPR155	0.125	0.057	1.53507	2.55469e-63	7.57056e-59
Treg	NEK10	0.011	0.005	1.53493	1.21783e-06	0.0360892
Treg	DCP1B	0.051	0.027	1.5347	3.4775e-16	1.03052e-11
Treg	SAYSD1	0.124	0.089	1.53341	6.11316e-17	1.81157e-12
Treg	UXS1	0.241	0.151	1.53278	2.86393e-65	8.48698e-61
Treg	SLA	0.429	0.2	1.52688	1.10379e-267	3.27098e-263
Treg	TRIM59	0.045	0.021	1.52355	1.1426e-21	3.38599e-17
Treg	SOCS1	0.247	0.123	1.52355	1.52304e-112	4.51336e-108
Treg	LINC00239	0.052	0.033	1.52286	4.035e-10	1.19573e-05
Treg	RP11-393I2.4	0.014	0.007	1.51966	2.97923e-07	0.00882866
Treg	CDIP1	0.116	0.067	1.51843	3.60994e-31	1.06977e-26
Treg	EPHB6	0.057	0.032	1.51731	1.47673e-16	4.37613e-12
Treg	THEM4	0.17	0.093	1.51389	1.19196e-57	3.53226e-53
Treg	NTRK1	0.011	0.003	1.5134	4.37532e-13	1.29658e-08

## Sheet: Table SVI
Table SVI. Coefficients of 13 prognostic genes.
gene	coefficient
CENPM	0.0532233
PTTG1	0.199178
IL1R2	0.0418385
BIRC3	0.277494
GLCCI1	-0.0648084
MAGEH1	-0.0643994
CD5	-0.0388079
CISH	-0.0697579
ZNF101	-0.543663
IKZF4	-0.097224
ASB2	-0.323307
ZC3H12D	-0.302617
CCR6	-0.101503

## Sheet: Table SVII
Table SVII. Spearman’s correlation analysis between 37 risk genes and the risk score.
gene	corr	p	p.adj
ZC3H12D	-0.568327	0	0
ZNF708	-0.547179	0	0
GPRASP1	-0.531401	0	0
FAM117A	-0.530746	0	0
ZNF540	-0.529279	0	0
CMAHP	-0.52796	0	0
ZCCHC18	-0.524499	0	0
LOC101928988	-0.523302	2.08683e-37	7.60429e-36
DNAJC27	-0.522962	0	0
IL16	-0.52223	0	0
GFRA1	-0.521552	0	0
SETBP1-DT	-0.520612	0	0
BCL2	-0.518456	0	0
DAPK2	-0.518445	0	0
WDFY4	-0.51616	0	0
LINC00861	-0.512173	0	0
NRIP2	-0.512149	0	0
CBFA2T3	-0.510608	0	0
ZNF333	-0.510062	0	0
STUM	-0.509009	3.65994e-35	1.33224e-33
KCNA2	-0.507775	5.65245e-35	2.05534e-33
ZNF763	-0.507399	0	0
TP53INP1	-0.50598	0	0
PRCD	-0.505631	0	0
PSMA3-AS1	-0.504925	0	0
TSPOAP1-AS1	-0.504736	0	0
RTL5	-0.503925	0	0
TENT5C	-0.502427	0	0
ACSS1	-0.50237	0	0
TSPOAP1	-0.50101	0	0
SLC25A42	-0.500983	0	0
RASGRP2	-0.500851	0	0
SETDB2	-0.5001	0	0
TK1	0.520339	0	0
GAPDH	0.530768	0	0
PKM	0.546007	0	0
SLC2A1	0.551474	0	0

## Sheet: Table SVIII
Table SVIII. Gene Ontology enrichment analysis of the risk genes.
ONTOLOGY	ID	Description	GeneRatio	BgRatio	pvalue	p.adjust	qvalue	geneID	Count
CC	GO:0044305	calyx of Held	2/30	19/19894	0.00036997	0.0355171	0.0303764	KCNA2/TSPOAP1	2
BP	GO:0006096	glycolytic process	3/28	90/18888	0.000314397	0.0423795	0.0338824	PKM/GAPDH/CBFA2T3	3
BP	GO:0046032	ADP catabolic process	3/28	92/18888	0.000335408	0.0423795	0.0338824	PKM/GAPDH/CBFA2T3	3
BP	GO:0019364	pyridine nucleotide catabolic process	3/28	94/18888	0.000357305	0.0423795	0.0338824	PKM/GAPDH/CBFA2T3	3
BP	GO:0009137	purine nucleoside diphosphate catabolic process	3/28	95/18888	0.000368591	0.0423795	0.0338824	PKM/GAPDH/CBFA2T3	3
BP	GO:0009181	purine ribonucleoside diphosphate catabolic process	3/28	95/18888	0.000368591	0.0423795	0.0338824	PKM/GAPDH/CBFA2T3	3
BP	GO:0072526	pyridine-containing compound catabolic process	3/28	97/18888	0.000391847	0.0423795	0.0338824	PKM/GAPDH/CBFA2T3	3
BP	GO:0009191	ribonucleoside diphosphate catabolic process	3/28	98/18888	0.00040382	0.0423795	0.0338824	PKM/GAPDH/CBFA2T3	3
BP	GO:0046031	ADP metabolic process	3/28	98/18888	0.00040382	0.0423795	0.0338824	PKM/GAPDH/CBFA2T3	3
BP	GO:0009134	nucleoside diphosphate catabolic process	3/28	102/18888	0.000454066	0.0423795	0.0338824	PKM/GAPDH/CBFA2T3	3
BP	GO:0009135	purine nucleoside diphosphate metabolic process	3/28	110/18888	0.000566237	0.0432399	0.0345703	PKM/GAPDH/CBFA2T3	3
BP	GO:0009179	purine ribonucleoside diphosphate metabolic process	3/28	110/18888	0.000566237	0.0432399	0.0345703	PKM/GAPDH/CBFA2T3	3
BP	GO:0006090	pyruvate metabolic process	3/28	118/18888	0.000694768	0.0469308	0.0375211	PKM/GAPDH/CBFA2T3	3
BP	GO:0009185	ribonucleoside diphosphate metabolic process	3/28	120/18888	0.000729565	0.0469308	0.0375211	PKM/GAPDH/CBFA2T3	3
BP	GO:0036037	CD8-positive, alpha-beta T cell activation	2/28	28/18888	0.000782179	0.0469308	0.0375211	WDFY4/BCL2	2
BP	GO:0009132	nucleoside diphosphate metabolic process	3/28	127/18888	0.000860057	0.0481632	0.0385064	PKM/GAPDH/CBFA2T3	3
CC, Cellular Component; BP, Biological Process.

## Sheet: Table SIX
Table SIX. Kyoto Encyclopedia of Genes and Genomes enrichment analysis of the risk genes.
category	subcategory	ID	Description	GeneRatio	BgRatio	pvalue	p.adjust	qvalue	geneID	Count
Metabolism	Carbohydrate metabolism	hsa00010	Glycolysis / Gluconeogenesis	3/14	67/8843	0.000142563	0.0105497	0.00930412	PKM/GAPDH/ACSS1	3
Environmental Information Processing	Signal transduction	hsa04066	HIF-1 signaling pathway	3/14	109/8843	0.000600675	0.0177717	0.0156735	SLC2A1/GAPDH/BCL2	3
Metabolism	Global and overview maps	hsa01200	Carbon metabolism	3/14	116/8843	0.000720475	0.0177717	0.0156735	PKM/GAPDH/ACSS1	3
Metabolism	Carbohydrate metabolism	hsa00620	Pyruvate metabolism	2/14	47/8843	0.00241583	0.0446928	0.0394161	PKM/ACSS1	2
